# Supplementary material
Source: HighWire-hosted journal article supplement (https://rsos.royalsocietypublishing.org/content/suppl/2016/09/20/rsos.160384)
Supplement: rsos160384supp1.pdf [file rsos160384supp1.pdf]

SI TEXT  
THE NATURAL SELECTION OF BAD SCIENCE

PAUL E. SMALDINO<sup>1</sup> AND RICHARD MCELREATH<sup>2,3</sup>

METHODS FOR META-ANALYSIS OF STATISTICAL POWER

2 The first review of statistical power in published research was performed by Cohen (1962).  
Two decades later, two retrospective analyses were performed by Sedlmeier and Gigerenzer  
4 (1989) and Rossi (1990) to examine the possibility of any changes in the statistical power of  
published research since Cohen's original study. Neither paper found any change.

6 We built on this research by aggregating reviews and meta-analyses from the social and  
behavioral sciences that looked at the statistical power in the published literature. To do this,  
8 we searched Google Scholar for publications citing Sedlmeier and Gigerenzer's 1989 paper  
(by far the more heavily cited of the two original reviews), using the search terms "statistical  
10 power" and "review." We selected only those papers that contained reviews of statistical  
power from published papers in the social and behavioral sciences, and specifically estimated  
12 power for small effect sizes ( $d = 0.2$  or equivalent). We restricted ourselves to small  
effects because, due to the large number of externalities in social and behavioral research,  
14 many effects should in fact be small. This led us to discard three papers that otherwise  
measured statistical power. The authors of the studies used all implemented Cohen's (1992)  
16 methods for the calculation of statistical power, assuming a rate of Type I errors of  $\alpha = 0.05$ .  
Our search yielded 16 additional review papers published between 1992 and 2014. One of  
18 these papers, Ison (2011), separately reported power for four different journals using widely  
different ranges of publication years. We therefore separately report these as four distinct  
20 data points. For all other reviews, some reported on single journals, while others used several  
journals within a given discipline. Some of these reports were for all papers published  
22 within a single year, while others reported the average power for papers published within a  
range of years. In the latter case, we report these data using the median year in the range.  
24 Importantly, we report data in terms of the year the original research papers, rather than the  
review, were published. The data for Figure 1 in the main text, including the sources, are  
26 given in Table 1.

---

<sup>1</sup>DEPARTMENT OF POLITICAL SCIENCE, UNIVERSITY OF CALIFORNIA-DAVIS, DAVIS, CA 95616

<sup>2</sup>DEPARTMENT OF ANTHROPOLOGY, UNIVERSITY OF CALIFORNIA-DAVIS, DAVIS, CA 95616

<sup>3</sup>MAX PLANCK INSTITUTE FOR EVOLUTIONARY ANTHROPOLOGY, LEIPZIG, GERMANY

*E-mail address:* paul.smaldino@gmail.com.

| Year | Effect Size |        |       | Field                       | Reference                                   |
|------|-------------|--------|-------|-----------------------------|---------------------------------------------|
|      | Small       | Medium | Large |                             |                                             |
| 1960 | 0.18        | 0.48   | 0.83  | abnormal & social psych.    | Cohen 1962 <sup>a,b</sup>                   |
| 1970 | 0.14        | 0.58   | 0.78  | education                   | Brewer 1972 <sup>a,b</sup>                  |
| 1970 | 0.15        | 0.54   | 0.83  | education                   | Jones & Brewer 1972 <sup>b</sup>            |
| 1970 | 0.22        | 0.71   | 0.87  | education                   | Pennick & Brewer 1973 <sup>b</sup>          |
| 1970 | 0.21        | 0.72   | 0.96  | education                   | Brewer & Owen 1973 <sup>a,b</sup>           |
| 1970 | 0.19        | 0.46   | 0.72  | education                   | Haase 1974 <sup>a,b</sup>                   |
| 1971 | 0.23        | 0.56   | 0.79  | communication               | Katzer & Sodt 1973 <sup>a,b</sup>           |
| 1972 | 0.55        | 0.84   | 0.94  | sociology                   | Spreitzer & Chase 1974 <sup>b</sup>         |
| 1973 | 0.18        | 0.52   | 0.79  | communication               | Chase & Tucker 1975 <sup>a,b</sup>          |
| 1973 | 0.16        | 0.44   | 0.73  | communication               | Kroll & Chase 1975 <sup>a,b</sup>           |
| 1974 | 0.34        | 0.76   | 0.91  | communication               | Chase & Baran 1976 <sup>a,b</sup>           |
| 1974 | 0.25        | 0.67   | 0.86  | applied psychology          | Chase & Chase 1976 <sup>a,b</sup>           |
| 1975 | 0.18        | 0.39   | 0.62  | education                   | Christensen & Christensen 1977 <sup>b</sup> |
| 1976 | 0.38        | 0.62   | 0.81  | physical anthropology       | Chase et al. 1978 <sup>b</sup>              |
| 1978 | 0.23        | 0.63   | 0.85  | education                   | Woolley & Dawson 1983 <sup>b</sup>          |
| 1979 | 0.41        | 0.89   | 0.98  | marketing                   | Sawyer & Ball 1981 <sup>a,b</sup>           |
| 1979 | 0.22        | 0.63   | 0.86  | education                   | Daly & Hexamer 1983 <sup>b</sup>            |
| 1980 | 0.37        | 0.65   | 0.93  | occupational therapy        | Ottenbacher 1982 <sup>b</sup>               |
| 1981 | 0.23        | 0.69   | 0.90  | education                   | Wooley 1983 <sup>b</sup>                    |
| 1981 | 0.31        | 0.76   | 0.92  | social work                 | Orme & Combs-Orme 1986 <sup>b</sup>         |
| 1981 | 0.20        | 0.68   | 0.88  | social work                 | Orme & Tolman 1986 <sup>b</sup>             |
| 1982 | 0.17        | 0.57   | 0.83  | abnormal & social psych.    | Rossi 1990                                  |
| 1983 | 0.09        | 0.51   | 0.92  | clinical psychology         | Acklin et al. 1992                          |
| 1984 | 0.12        | 0.37   | 0.86  | abnormal & social psych.    | Sedlmeier & Gigerenzer 1989 <sup>b</sup>    |
| 1984 | 0.23        | 0.59   | 0.83  | management                  | Marzen et al. 1987a <sup>b</sup>            |
| 1984 | 0.31        | 0.77   | 0.91  | management                  | Marzen et al. 1987b <sup>b</sup>            |
| 1989 | 0.09        | 0.37   | 0.76  | psychotherapy               | Kazantis 2000                               |
| 1989 | 0.13        | 0.64   | 0.97  | music education             | Daniel 1993                                 |
| 1990 | 0.10        | 0.52   | 0.92  | psychology education        | Tomcho & Foels 2009                         |
| 1993 | 0.49        | 0.65   | 0.85  | operations research         | Verma & Goodale 1995                        |
| 1993 | 0.27        | 0.74   | 0.92  | management                  | Mone et al. 1996                            |
| 1995 | 0.29        | NA     | NA    | management                  | Cashen & Geiger 2004                        |
| 1995 | 0.23        | 0.71   | 0.93  | behavioral accounting       | Borkowski et al. 2001                       |
| 1996 | 0.14        | 0.41   | 0.62  | aviation                    | Ison 2011                                   |
| 1997 | 0.36        | 0.77   | 0.92  | health psychology           | Maddock & Rossi 2001                        |
| 1998 | 0.16        | 0.70   | 0.92  | aviation                    | Ison 2011                                   |
| 1999 | 0.11        | 0.36   | 0.63  | software engineering        | Dyba et al. 2006                            |
| 2000 | 0.15        | 0.43   | 0.69  | behavioral ecology          | Jennions & Møller 2003                      |
| 2000 | 0.06        | 0.13   | 0.25  | neuroscience                | Woods et al. 2006                           |
| 2000 | 0.43        | 0.75   | 0.91  | aviation                    | Ison 2011                                   |
| 2005 | 0.45        | 0.99   | 1.00  | international business      | Zhan 2013                                   |
| 2005 | 0.27        | 0.61   | 0.80  | aviation                    | Ison 2011                                   |
| 2008 | 0.17        | NA     | NA    | social & personality psych. | Fraley & Vazire 2014                        |
| 2011 | 0.27        | 0.54   | 0.95  | neuroscience                | Button et al. 2013                          |

TABLE 1. Power estimates based on the median year of papers published in each reference. <sup>a</sup>Included in Sedlmeier & Gigerenzer (1989). <sup>b</sup>Included in Rossi (1990). NA indicates that power calculations were not reported in the original review papers.

## REFERENCES

- 28 Acklin, M. W., McDowell II, C. J., and Orndoff, S. (1992). Statistical power and the rorschach:  
1975-1991. *Journal of Personality Assessment*, 59(2):366–379.
- 30 Borkowski, S. C., Welsh, M. J., and Zhang, Q. (2001). An analysis of statistical power in  
behavioral accounting research. *Behavioral Research in Accounting*, 13(1):63–84.
- 32 Button, K. S., Ioannidis, J. P., Mokrysz, C., Nosek, B. A., Flint, J., Robinson, E. S., and Mu-  
nafò, M. R. (2013). Power failure: Why small sample size undermines the reliability of  
34 neuroscience. *Nature Reviews Neuroscience*, 14(5):365–376.
- Cashen, L. H. and Geiger, S. W. (2004). Statistical power and the testing of null hypotheses:  
36 A review of contemporary management research and recommendations for future studies.  
*Organizational Research Methods*, 7(2):151–167.
- 38 Cohen, J. (1962). The statistical power of abnormal-social psychological research: A review.  
*Journal of Abnormal and Social Psychology*, 65(3):145–153.
- 40 Cohen, J. (1992). Statistical power analysis. *Current Directions in Psychological Science*,  
1:98–101.
- 42 Daniel, T. D. (1993). *A Statistical Power Analysis of the Quantitative Techniques Used in  
the “Journal of Research in Music Education,” 1987 through 1991*. PhD thesis, Auburn  
44 University, Birmingham, AL.
- Dybå, T., Kampenes, V. B., and Sjøberg, D. I. (2006). A systematic review of statistical power  
46 in software engineering experiments. *Information and Software Technology*, 48(8):745–  
755.
- 48 Fraley, R. C. and Vazire, S. (2014). The n-pact factor: Evaluating the quality of empirical  
journals with respect to sample size and statistical power. *PLoS ONE*, 9(10):e109019.
- 50 Ison, D. C. (2011). An analysis of statistical power in aviation research. *International Journal  
of Applied Aviation Studies*, 11(1):67.
- 52 Jennions, M. D. and Møller, A. P. (2003). A survey of the statistical power of research in  
behavioral ecology and animal behavior. *Behavioral Ecology*, 14(3):438–445.
- 54 Kazantzis, N. (2000). Power to detect homework effects in psychotherapy outcome research.  
*Journal of Consulting and Clinical Psychology*, 68(1):166.
- 56 Maddock, J. E. and Rossi, J. S. (2001). Statistical power of articles published in three health-  
psychology related journals. *Health Psychology*, 20(1):76.
- 58 Mone, M. A., Mueller, G. C., and Mauland, W. (1996). The perceptions and usage of sta-  
tistical power in applied psychology and management research. *Personnel Psychology*,  
60 49(1):103–120.
- Rossi, J. S. (1990). Statistical power of psychological research: What have we gained in 20  
62 years? *Journal of Consulting and Clinical Psychology*, 58(5):646.
- Sedlmeier, P. and Gigerenzer, G. (1989). Do studies of statistical power have an effect on the  
64 power of studies? *Psychological Bulletin*, 105(2):309–316.
- Tomcho, T. J. and Foels, R. (2009). The power of teaching activities: Statistical and method-  
66 ological recommendations. *Teaching of Psychology*, 36(2):96–101.
- Verma, R. and Goodale, J. C. (1995). Statistical power in operations management research.  
68 *Journal of Operations Management*, 13(2):139–152.
- Woods, S. P., Rippeth, J. D., Conover, E., Carey, C. L., Parsons, T. D., and Tröster, A. I. (2006).  
70 Statistical power of studies examining the cognitive effects of subthalamic nucleus deep  
brain stimulation in parkinson’s disease. *The Clinical Neuropsychologist*, 20(1):27–38.

- 72 Zhan, G. (2013). Statistical power in international business research: Study levels and data types. *International Business Review*, 22(4):678–686.
